# Supplementary material for: Precise Surface State Control of Carbon Quantum Dots to Enhance Charge Extraction for Solar Cells
Source: PubMed Central journal article supplement (PMC7153469; doi:10.3390/nano10030460), 2020-03-04
Supplement: nanomaterials-10-00460-s001.pdf [file nanomaterials-10-00460-s001.pdf]

## *Supporting documents*

### **1. Experimental section**

#### **1.1 Preparation of fluorescent N-CQDs**

N-CQDs were synthesized using natural chitosan powders as the precursor via a traditional hydrothermal method. In a representative synthesis, 0.5 g of chitosan powders was dissolved in 70 mL of pure water. Then the resultant solution was transferred into a 100 mL Teflon-lined autoclave. The reaction temperature was controlled at 180 °C for 0.5, 1, 2, 4, 8 and 16 h to obtain N-CQD aqueous solutions. The N-CQDs powders was obtained by freeze-drying for 50 h, and the obtained N-CQDs powders were re-dispersed in ethylalcohol at a concentration of 50 mg mL<sup>-1</sup> for use.

#### **1.2 Preparation of co-sensitized TiO<sub>2</sub> photoanodes**

The TiO<sub>2</sub> films were prepared according to the previously reported method<sup>[1]</sup>. Subsequently, the resultant TiO<sub>2</sub> films were immersed for 16hrs in the N-CQDs aqueous solution at room temperature to obtained the N-CQDs sensitized TiO<sub>2</sub> photoanodes. For the N-CQDs/N719 co-sensitized photoanodes, the resultant TiO<sub>2</sub> films were first immersed for 24h in a 0.5 mM N719 ethanol solution, and the sensitized electrodes were washed with ethanol and dried under a N<sub>2</sub> stream. The 0.1mL as-prepared N-CQDs (50 mg mL<sup>-1</sup>) were deposited onto the top of the N719

sensitized electrode via a spin-coating method with the speed of 300 rpm<sup>[2]</sup>.

### **1.3 Fabrication of N-CQDs sensitized solar cells and co-sensitized solar cells**

N-CQDs sensitized solar cells are composed of a mesoporous TiO<sub>2</sub> film, which is sensitized with the optimized N-CQDs, a I<sup>-</sup>/I<sub>3</sub><sup>-</sup> redox electrolyte and a Pt<sub>3</sub>Ni alloy counter electrode (CE), the preparation of Pt<sub>3</sub>Ni alloy CE and liquid electrolyte were based on previously report<sup>[3]</sup>. A liquid electrolyte composed of 0.1 M tetraethylammonium iodide, 0.1 M tetrabutylammonium iodide, 0.1 M LiI, 0.1 M NaI, 0.1 M KI, 0.05 M I<sub>2</sub> and 0.05 M 4-tertbutyl-pyridine in acetonitrile. Each co-sensitized solar cell device was built by sandwiching a I<sup>-</sup>/I<sub>3</sub><sup>-</sup> redox electrolyte between a N-CQD/N719 co-sensitized TiO<sub>2</sub> photoanode and a Pt<sub>3</sub>Ni alloy CE.

### **1.4 Characterization**

The morphology of the N-CQDs was investigated by transmission electron microscopy (TEM, FEI Tecnai G-20). Fourier transform infrared (FT-IR) spectra of optimized N-CQDs were measured to investigate specific molecule-groups information (Bruker VERTEX70). The crystal structure of N-CQDs was analyzed by a X-ray diffraction (SHIMADZU XRD-6000, corporation, Japan) with Cu radiation ( $\lambda = 0.154$  nm) at 40 kV and 40 mA. Raman spectrum (Perkin Elmer, UK) were employed to characterize the N-CQDs structures at room temperature. The ultraviolet-visible absorption characterization was carried out on a UV-8000PC UV-Visible

spectrophotometer. The fluorescence spectra were measured with a fluorescence spectrometer (F-7000, Hitachi High Tech CO, Japan) with various excitation wavelengths. The X-ray photoelectron spectroscopy (XPS, Escalab 250Xi system) were conducted to analyze the surface properties. The energy levels of N-CQDs were performed via a cyclic voltammetry (CV) method using a standard three-electrode system, with a N-CQDs/TiO<sub>2</sub> photoelectrode, a saturated Ag/AgCl reference electrode and a Pt mesh counter electrode. The CV curves were scanned from -1.2 to 1.2 V at a scanning rate of 50 mV s<sup>-1</sup>. The LUMO and HOMO levels were calculated according to the following formula:  $E_{\text{LUMO}} = -e (E_{\text{red}} + 4.4) \text{ V}$ ,  $E_{\text{HOMO}} = -e (E_{\text{ox}} + 4.4) \text{ V}$ .

The photocurrent-voltage (*J-V*) measurements of devices were performed by using a CHI660E electrochemical workstation under irradiation of a simulated AM1.5 light illumination (SS-20FL Solar simulator, 100 mW cm<sup>-2</sup> calibrated by a standard silicon solar cell). The active area is 0.25 cm<sup>2</sup> for both solar cells. Each *J-V* curve was repeated measured at least 15 times to eliminate experimental errors. The Electrochemical impedance spectroscopy (EIS) was measured by using the same equipment and setup,

## 2. Supporting Figures and Tables

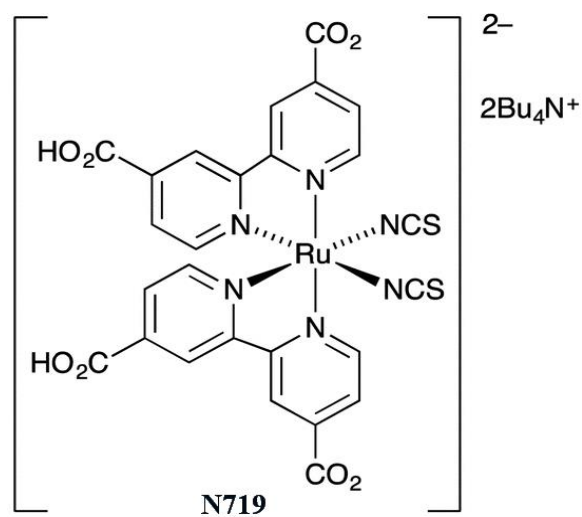

**Fig. S1** the chemical structure of the N719 dye

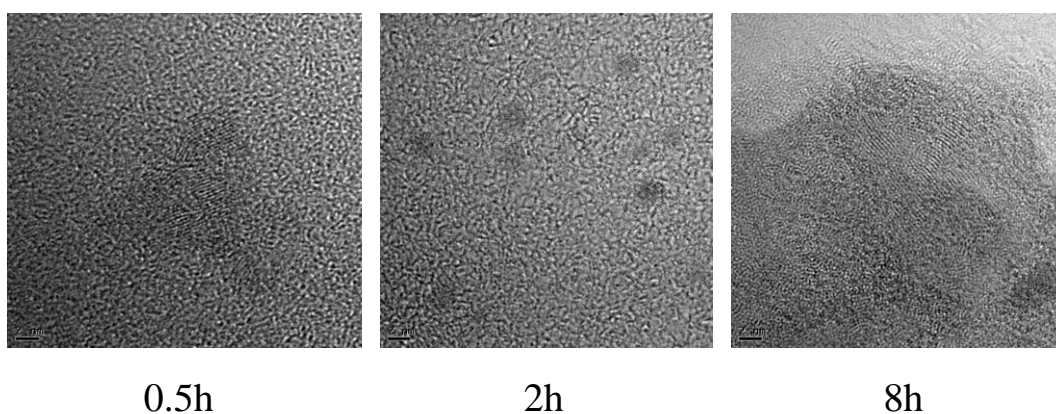

**Fig. S2** The high resolution TEM micrograph of N-CQDs at 0.5h, 2h and 8h heating times.

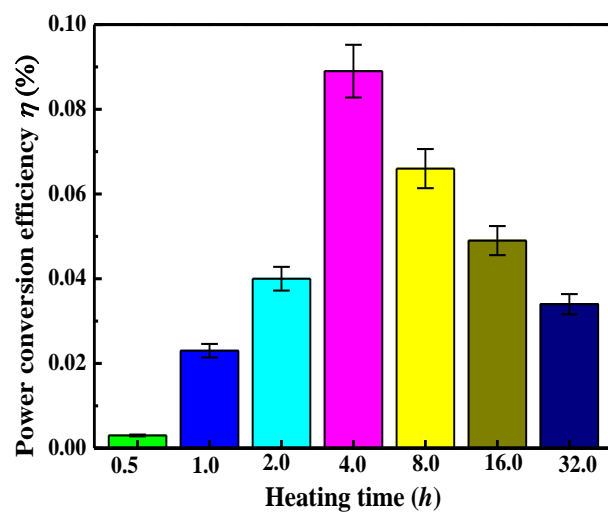

**Fig. S3** Average power conversion efficiencies of various N-CQDs tailored QDSSCs. Error bars show the standard deviation among 15 measurements for the same device.

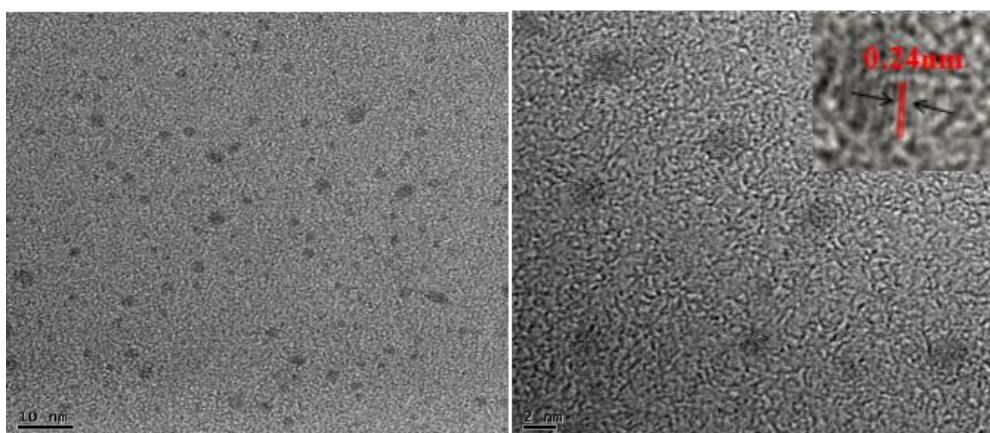

**Fig. S4** The high resolution TEM micrograph of optimized N-CQDs.

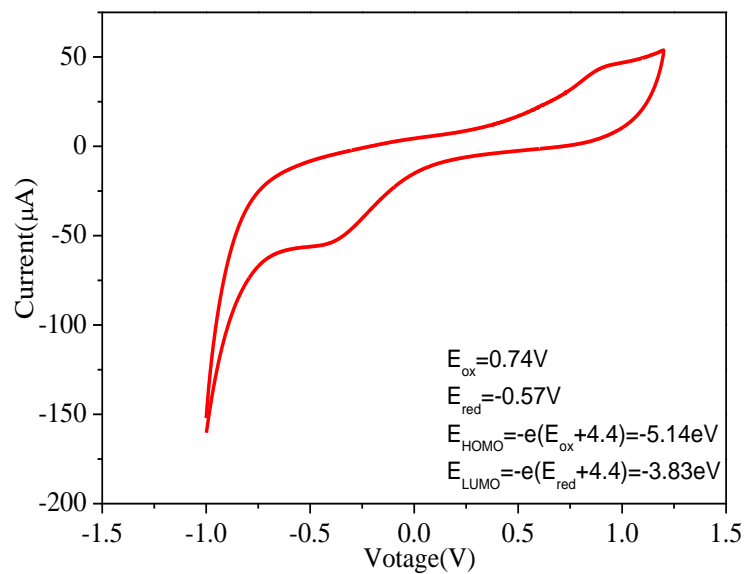

**Fig. S5** Cyclic voltammograms for N-CQDs at 2h heating time.

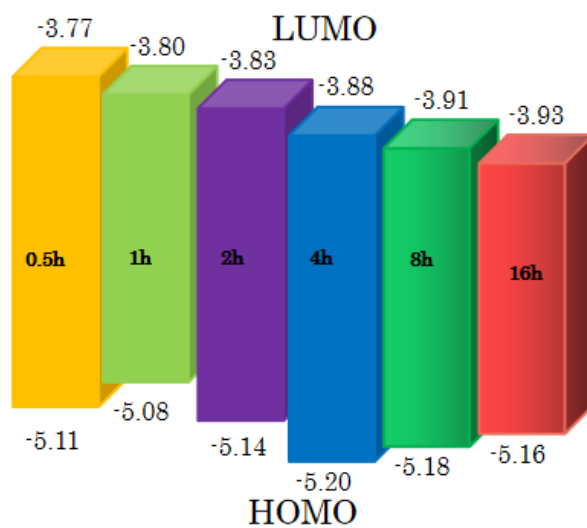

**Fig. S6** The energy level of N-CQDs with different heating times.

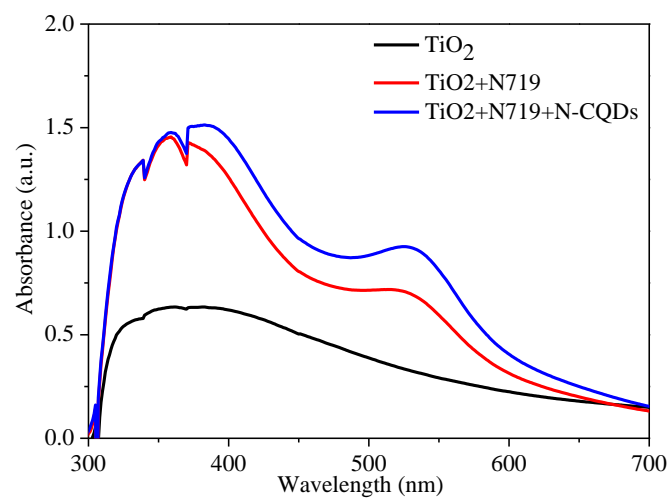

**Fig. S7** The UV-vis diffuse reflectance absorption spectra of  $\text{TiO}_2$ ,  $\text{TiO}_2/\text{N719}$  and  $\text{TiO}_2/\text{N719}/\text{N-CQDs}$ .

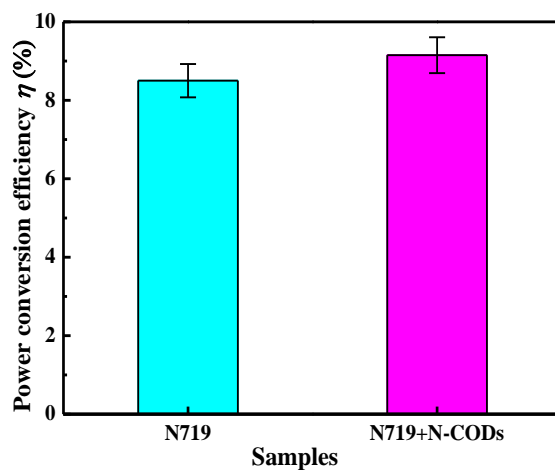

**Fig. S8** Error bars of the DSSCs with or without N-CQDs, the standard deviation among 15 measurements for the same device.

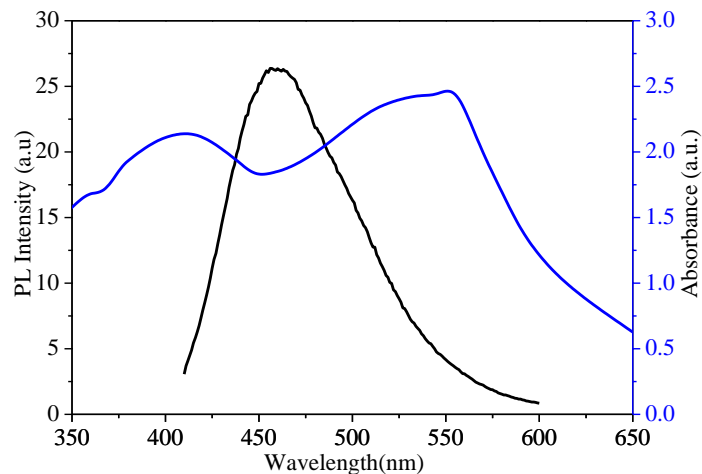

**Fig. S9** The absorption spectrum of N719 dye (black line) and emission spectra of N-CQDs (blue line) upon excitation at 390 nm, in order to support the FRET mechanism.

**Table S1** The comparison data about as-prepared CQDs outstanding advantages other kinds of carbon dots sensitized solar cells reported previously as light absorbers

| Teams                                    | Carbon resource         | Preparation methods            | $V_{oc}$ (mV) | $J_{sc}$ (mA) | $FF$ (%) | $\eta$ (%) |
|------------------------------------------|-------------------------|--------------------------------|---------------|---------------|----------|------------|
| Yan <i>et al</i> <sup>[4]</sup>          | Graphenes               | solubilization strategy        | 480           | 0.2           | 0.58     | 0.056      |
| Mirtchev <i>et al</i> <sup>[5]</sup>     | $\gamma$ -butyrolactone | Carbonization with strong acid | 370           | 0.516         | 0.59     | 0.13       |
| Xiaochen Guo <i>et al</i> <sup>[6]</sup> | Bee Pollens             | Hydrothermal                   | 461           | 0.33          | 0.73     | 0.11       |
| Our group                                | chitosan                | Hydrothermal                   | 428           | 0.369         | 0.56     | 0.089      |



**Table S2** Electrochemical parameters for N-CQDs sensitized solar cells.  $R_s$  is series resistance;  $R_{ct1}$  refers to charge-transfer resistance at Pt counter electrode/electrolyte interface;  $R_{ct2}$  corresponds to charge-transfer resistance at photoanode/electrolyte interface. The tail in the low frequency region indicates Warburg diffusion process of redox couples ( $W$ ).

| Heating time (h) | $R_s$<br>(ohm cm <sup>2</sup> ) | $R_{ct1}$<br>(ohm cm <sup>2</sup> ) | $R_{ct2}$<br>(ohm cm <sup>2</sup> ) | $W$<br>(ohm cm <sup>2</sup> ) |
|------------------|---------------------------------|-------------------------------------|-------------------------------------|-------------------------------|
| Raw carbon       | 12.6                            | 46.8                                | 1240                                | 145                           |
| 0.5h             | 5.71                            | 23.1                                | 457                                 | 63.2                          |
| 2h               | 2.52                            | 16.7                                | 200                                 | 24.5                          |
| 16h              | 2.50                            | 42.7                                | 358                                 | 43.8                          |

**Table S3** The comparison data about the co-sensitized solar cells reported previously

| Teams                                 | Absorber     | $V_{oc}$ (mV) | $J_{sc}$ (mA) | $FF$ (%) | $\eta$ (%) |
|---------------------------------------|--------------|---------------|---------------|----------|------------|
| Zhu <i>et al</i> <sup>[7]</sup>       | Dye+PEG-CQDs | 708           | 17.01         | 0.68     | 8.19       |
| Fang <i>et al</i> <sup>[8]</sup>      | Dye+PEG-GQDs | 660           | 14.07         | 0.59     | 6.10       |
| Mihalache <i>et al</i> <sup>[9]</sup> | N3+GQDs      | 583           | 5.58          | 0.66     | 2.15       |
| Our group                             | Dye+N-CQDs   | 753           | 17            | 0.72     | 9.15       |

**Table S4** Electrochemical parameters for co-sensitized solar cells.  $R_s$  is series resistance;  $R_{ct1}$  refers to charge-transfer resistance at Pt counter electrode/electrolyte interface;  $R_{ct2}$  corresponds to charge-transfer resistance at photoanode/electrolyte interface. The tail in the low frequency region indicates Warburg diffusion process of redox couples ( $W$ ).

| Sample    | $R_s$<br>(ohm cm <sup>2</sup> ) | $R_{ct1}$<br>(ohm cm <sup>2</sup> ) | $R_{ct2}$<br>(ohm cm <sup>2</sup> ) | $W$<br>(ohm cm <sup>2</sup> ) |
|-----------|---------------------------------|-------------------------------------|-------------------------------------|-------------------------------|
| N719      | 0.87                            | 0.67                                | 11.13                               | 1.62                          |
| N719+CQDs | 0.65                            | 0.55                                | 8.55                                | 0.82                          |

## References

- [1] Tang, Q.W.; Zhang, H.H.; Meng, Y.Y.; He, B.L.; Yu, L.M. Dissolution Engineering of Platinum Alloy Counter Electrodes in Dye-Sensitized Solar Cells. *Angew. Chem. Int. Ed.* 2015, 54, 11610–11614.
- [2] Kundua, S.; Sarojinijeeva, P.; Karthick, R.; Anantharaj, G.; Saritha, G.; Bera, R.; Anandan, S.; Patra, A.; Ragupathy, P.; Selvaraj, M.; et al. Enhancing the Efficiency of DSSCs by the Modification of TiO<sub>2</sub> Photoanodes using N, F and S, co-doped Graphene Quantum Dots. *Electrochim. Acta* 2017, 242, 337–343.
- [3] Tang, Q.W.; Duan, Y.Y.; He, B.L.; Chen, H.Y. Platinum Alloy Tailored All-Weather Solar Cells for Energy Harvesting from Sun and Rain. *Angew. Chem. Int. Ed.* 2016, 128, 14624–14628.
- [4] Yan, X.; Cui, X.; Li, B.; Li, L.S. Solution-Processable Graphene Quantum Dots as Light Absorbers for Photovoltaics. *Nano Lett.* 2010, 10, 1869-1873.
- [5] Mirtchev, P.; Henderson, E.J.; Soheilnia, N.; Yip, C.M.; Ozin, G.A.; Solution phase synthesis of carbon quantum dots as sensitizers for nanocrystalline TiO<sub>2</sub> solar cells. *J. Mater. Chem.* 2012, 22, 1265-1269.

- [6] Guo, X.; Zhang, H.; Sun, H.; Tade, M.O.; Wang, S.; Green Synthesis of Carbon Quantum Dots for Sensitized Solar Cells. *ChemPhotoChem* 2017, 1, 1-5.
- [7] Zhu, W.L.; Duan, J.L.; Duan, Y.Y.; Zhao, Y.Y.; Tang, Q.W. Efficiency enhancement of hybridized solar cells through co-sensitization and fast charge extraction by up-converted polyethylene glycol modified carbon quantum dots. *J. Power Sources* 2017, 367, 158-166.
- [8] Fang, X.; Li, M.; Guo, K. *et al.* Graphene quantum dots optimization of dye-sensitized solar cells, *Electrochim. Acta* 2014, 137, 634-638.
- [9] Mihalachem, I.; Radoi, A.; Mihail, M.; Munteanu, C.; Marin, A.; Danila, M.; Kusko, M.; Kusko, C. Charge and energy transfer interplay in hybrid sensitized solar cells mediated by graphene quantum dots. *Electrochim. Acta* 2015, 153, 306-315.
